# Supplementary material for: De novo transcriptome assembly and analysis of differential gene expression in response to drought in European beech
Source: PubMed Central journal article supplement (PMC5584803; doi:10.1371/journal.pone.0184167), 2017-09-05
Supplement: pone.0184167.s001.pdf [file pone.0184167.s001.pdf]

| Gene                                                                             | Contig no.   | Forward primer sequence (5'-3') | Reverse primer sequence (5'-3') | Primer efficiency [%] |
|----------------------------------------------------------------------------------|--------------|---------------------------------|---------------------------------|-----------------------|
| <i>Cytochrome p450</i>                                                           | Contig_13761 | CAGCGGTAGAAGAATGTGCC            | GTTTCATCTGACGGGTTTGCA           | 100                   |
| <i>Galactinol synthase family protein</i>                                        | Contig_6371  | ATGGAGGTACTGTTGGGAGG            | GCACCAACAGAAGCCAATGT            | 105                   |
| <i>Low-temperature-induced 65 kda</i>                                            | Contig_13090 | CGGTTACTGGGACTGAGT              | TCATCACCAGGCCTCAACTT            | 101                   |
| <i>Nitrate transporter -like</i>                                                 | Contig_10659 | CATGAAGGCGGGATCACTCT            | CCTAAGGGTTGTGGGTGCAA            | 99                    |
| <i>Octicosapeptide phox bem1p family isoform 1</i>                               | Contig_5573  | CTCTCAACAACAGCGTTGGC            | CTGCCGGGTCGACCTTATTT            | 100                   |
| <i>Protein p21-like</i>                                                          | Contig_6745  | CACATTTACGTGCCCTGGTG            | AGCGTCTGCGCAACTAAT              | 97                    |
| <i>Serine-threonine protein plant</i>                                            | Contig_14505 | CTTTCCCAGCCGACATAAGC            | GTCAGAAGATTCCACGGTGC            | 97                    |
| <i>Protein yls9-like</i>                                                         | Contig_2897  | GGGAGTCAGATAAGTGGGTGG           | TGTCCGGTCAAAGCCAAGTT            | 96                    |
| <i>UDP-glycosyltransferase74b1-like</i>                                          | Contig_1957  | AATGGGTGGTGGCTAGAGTG            | TGCTCACTTATCCTGCCCAA            | 100                   |
| <i>Receptor-like protein 12</i>                                                  | Contig_21713 | TTTGCGGATCTTGGACCTCT            | CACCTTCTCCACGTTCGTC             | 94                    |
| <i>Probable lrr receptor-like serine threonine-protein kinase at4g36180-like</i> | Contig_11937 | CTGTAACGCGCCAATGTCTG            | TCTGGGACAATTCCGAGGGA            | 95                    |
| <i>CCT motif family protein isoform partial</i>                                  | Contig_1104  | CATGGTCAATCCCTGGCCTT            | GACATGGGTAAGGACCACCA            | 95                    |
