# Supplementary material for: De novo transcriptome assembly and analysis of differential gene expression in response to drought in European beech
Source: PubMed Central journal article supplement (PMC5584803; doi:10.1371/journal.pone.0184167), 2017-09-05
Supplement: pone.0184167.s002.pdf [file pone.0184167.s002.pdf]

| Sample_ID           | No. of reads before trimming | No. of reads after trimming | Mean PHRED-score before trimming | Mean PHRED-score after trimming |
|---------------------|------------------------------|-----------------------------|----------------------------------|---------------------------------|
| Sample_M-13-5.7_R1  | 44,623,168                   | 44,117,574                  | 34.9                             | 35.8                            |
| Sample_M-14-5.7_R1  | 50,992,910                   | 48,552,174                  | 33.1                             | 35.2                            |
| Sample_M-21-5.7_R1  | 47,356,660                   | 46,737,498                  | 34.4                             | 35.5                            |
| Sample_M-36-5.7_R1  | 49,339,098                   | 47,002,580                  | 34.1                             | 35.8                            |
| Sample_M-43-5.7_R1  | 46,668,714                   | 46,323,498                  | 35.2                             | 35.9                            |
| Sample_M-45-5.7_R1  | 41,870,624                   | 40,907,606                  | 34.6                             | 35.8                            |
| Sample_M-46-5.7_R1  | 46,489,636                   | 45,829,022                  | 34.3                             | 35.5                            |
| Sample_M-48-5.7_R1  | 53,375,384                   | 52,384,714                  | 34.7                             | 35.8                            |
| Sample_M-51-5.7_R1  | 43,802,330                   | 43,409,632                  | 34.3                             | 35.4                            |
| Sample_M-16-5.7_R1  | 46,364,246                   | 45,839,476                  | 35.2                             | 36.1                            |
| Sample_M-13-12.7_R1 | 41,054,422                   | 40,513,112                  | 34.7                             | 35.7                            |
| Sample_M-14-12.7_R1 | 55,479,180                   | 52,441,794                  | 33.2                             | 35.3                            |
| Sample_M-16-12.7_R1 | 49,735,274                   | 49,283,462                  | 35.4                             | 36.2                            |
| Sample_M-21-12.7_R1 | 51,689,256                   | 48,353,466                  | 33.7                             | 35.7                            |
| Sample_M-36-12.7_R1 | 48,788,538                   | 48,292,778                  | 34.5                             | 35.5                            |
| Sample_M-43-12.7_R1 | 52,433,046                   | 49,932,656                  | 34                               | 35.8                            |
| Sample_M-45-12.7_R1 | 53,104,546                   | 52,425,566                  | 34.8                             | 35.8                            |
| Sample_M-46-12.7_R1 | 52,922,942                   | 49,880,058                  | 33.3                             | 35.3                            |
| Sample_M-48-12.7_R1 | 48,989,730                   | 48,401,164                  | 34.6                             | 35.6                            |
| Sample_M-51-12.7_R1 | 45,216,218                   | 44,759,886                  | 35                               | 35.9                            |
| Sample_M-13-19.7_R1 | 41,356,318                   | 40,853,662                  | 35                               | 36                              |
| Sample_M-14-19.7_R1 | 40,594,902                   | 40,303,490                  | 34.2                             | 35.3                            |
| Sample_M-16-19.7_R1 | 44,677,018                   | 41,336,976                  | 33.7                             | 36                              |
| Sample_M-21-19.7_R1 | 47,252,340                   | 46,787,140                  | 35.1                             | 36                              |
| Sample_M-36-19.7_R1 | 47,460,264                   | 44,522,060                  | 33.7                             | 35.8                            |
| Sample_M-43-19.7_R1 | 52,548,750                   | 52,148,238                  | 34.9                             | 35.8                            |
| Sample_M-45-19.7_R1 | 49,333,812                   | 46,350,628                  | 33.4                             | 35.5                            |
| Sample_M-46-19.7_R1 | 53,755,666                   | 53,335,734                  | 34.6                             | 35.5                            |
| Sample_M-48-19.7_R1 | 52,268,774                   | 51,921,888                  | 35.2                             | 36                              |
| Sample_M-51-19.7_R1 | 47,449,672                   | 44,320,480                  | 32.9                             | 35.3                            |
| Sample_M-13-26.7_R1 | 44,444,056                   | 43,965,736                  | 34.8                             | 35.8                            |
| Sample_M-14-26.7_R1 | 41,046,320                   | 40,211,248                  | 34.3                             | 35.5                            |
| Sample_M-16-26.7_R1 | 46,246,094                   | 45,919,658                  | 35.4                             | 36.2                            |
| Sample_M-21-26.7_R1 | 39,069,820                   | 38,651,748                  | 34.8                             | 35.8                            |
| Sample_M-36-26.7_R1 | 38,592,754                   | 38,256,240                  | 34.5                             | 35.6                            |
| Sample_M-43-26.7_R1 | 44,125,740                   | 41,623,340                  | 34.1                             | 35.9                            |
| Sample_M-45-26.7_R1 | 50,409,884                   | 49,992,034                  | 35.1                             | 35.9                            |
| Sample_M-46-26.7_R1 | 43,302,628                   | 42,889,650                  | 34.8                             | 35.7                            |
| Sample_M-48-26.7_R1 | 47,348,584                   | 46,694,530                  | 34.6                             | 35.7                            |
| Sample_M-51-26.7_R1 | 47,912,194                   | 47,517,116                  | 34.5                             | 35.5                            |
| Sample_M-13-28.6_R1 | 59,485,248                   | 58,414,100                  | 34.6                             | 35.7                            |
| Sample_M-14-28.6_R1 | 51,593,394                   | 50,950,714                  | 34.6                             | 35.6                            |
| Sample_M-16-28.6_R1 | 47,567,016                   | 45,642,818                  | 34                               | 35.7                            |
| Sample_M-21-28.6_R1 | 51,319,448                   | 50,872,594                  | 34.3                             | 35.4                            |

|                                     |            |            |      |      |
|-------------------------------------|------------|------------|------|------|
| <b>Sample_M-36-28.6_R1</b>          | 47,584,788 | 46,959,900 | 34.6 | 35.7 |
| <b>Sample_M-43-28.6_R1</b>          | 45,649,024 | 45,044,710 | 35   | 35.9 |
| <b>Sample_M-45-28.6_R1</b>          | 44,935,416 | 44,497,572 | 34.9 | 35.8 |
| <b>Sample_M-46-28.6_R1</b>          | 35,387,258 | 34,922,516 | 33.8 | 35.2 |
| <b>Sample_M-48-28.6_R1</b>          | 51,185,830 | 50,804,380 | 35   | 35.8 |
| <b>Sample_M-51-28.6_R1</b>          | 56,788,510 | 53,692,458 | 33.5 | 35.4 |
| <b>Sample_Mischprobe-Mueller_R1</b> | 43,309,878 | 41,186,808 | 33.8 | 35.6 |
