# Supplementary material for: De novo transcriptome assembly and analysis of differential gene expression in response to drought in European beech
Source: PubMed Central journal article supplement (PMC5584803; doi:10.1371/journal.pone.0184167), 2017-09-05

## Sampling day June 28

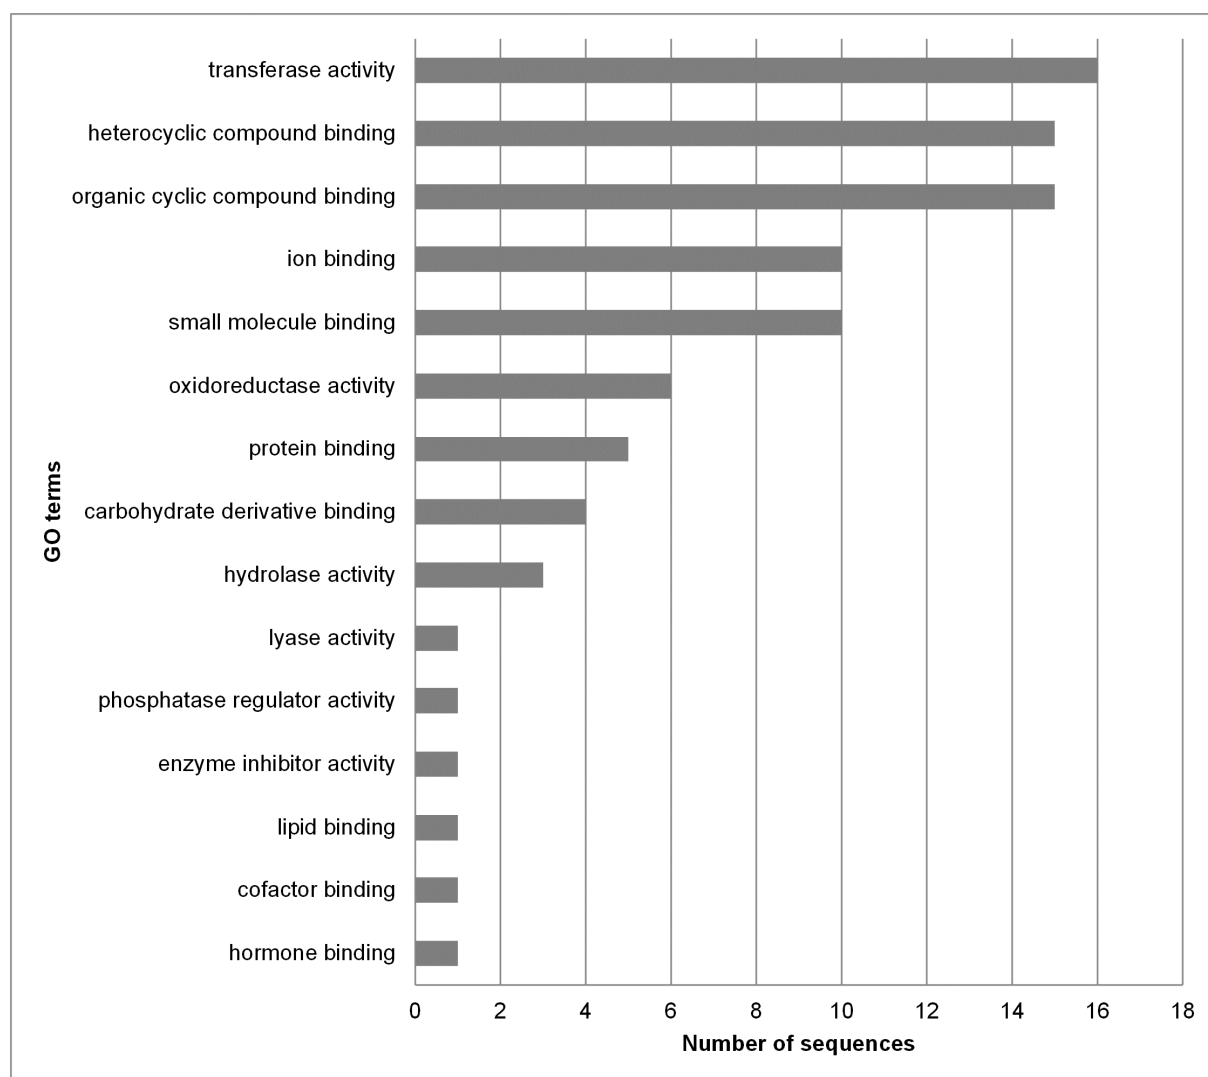

## Sampling day July 5

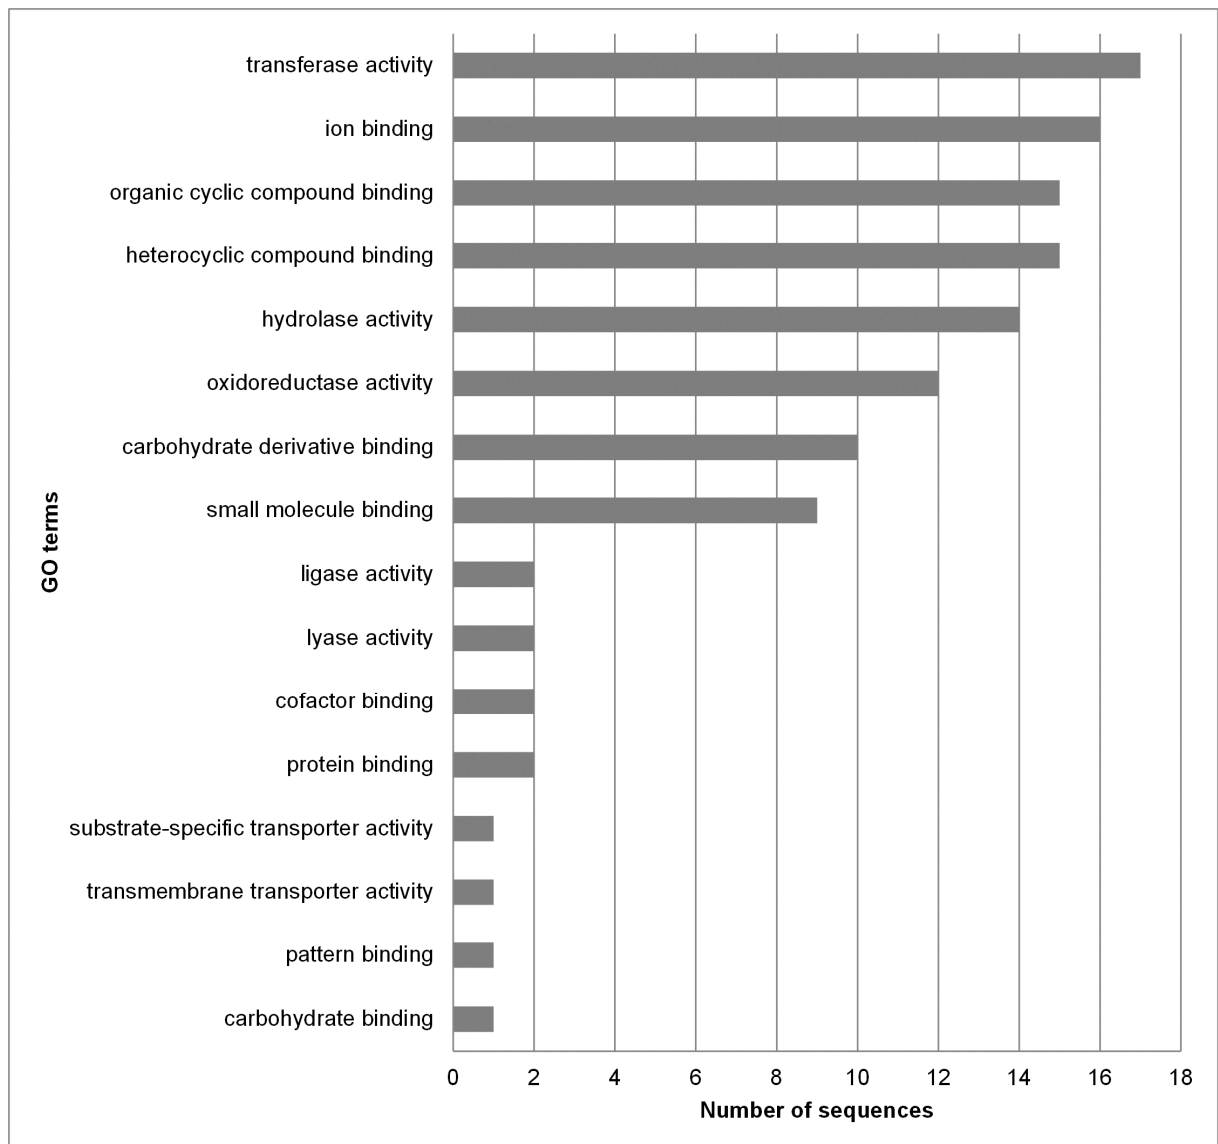

## Sampling day July 12

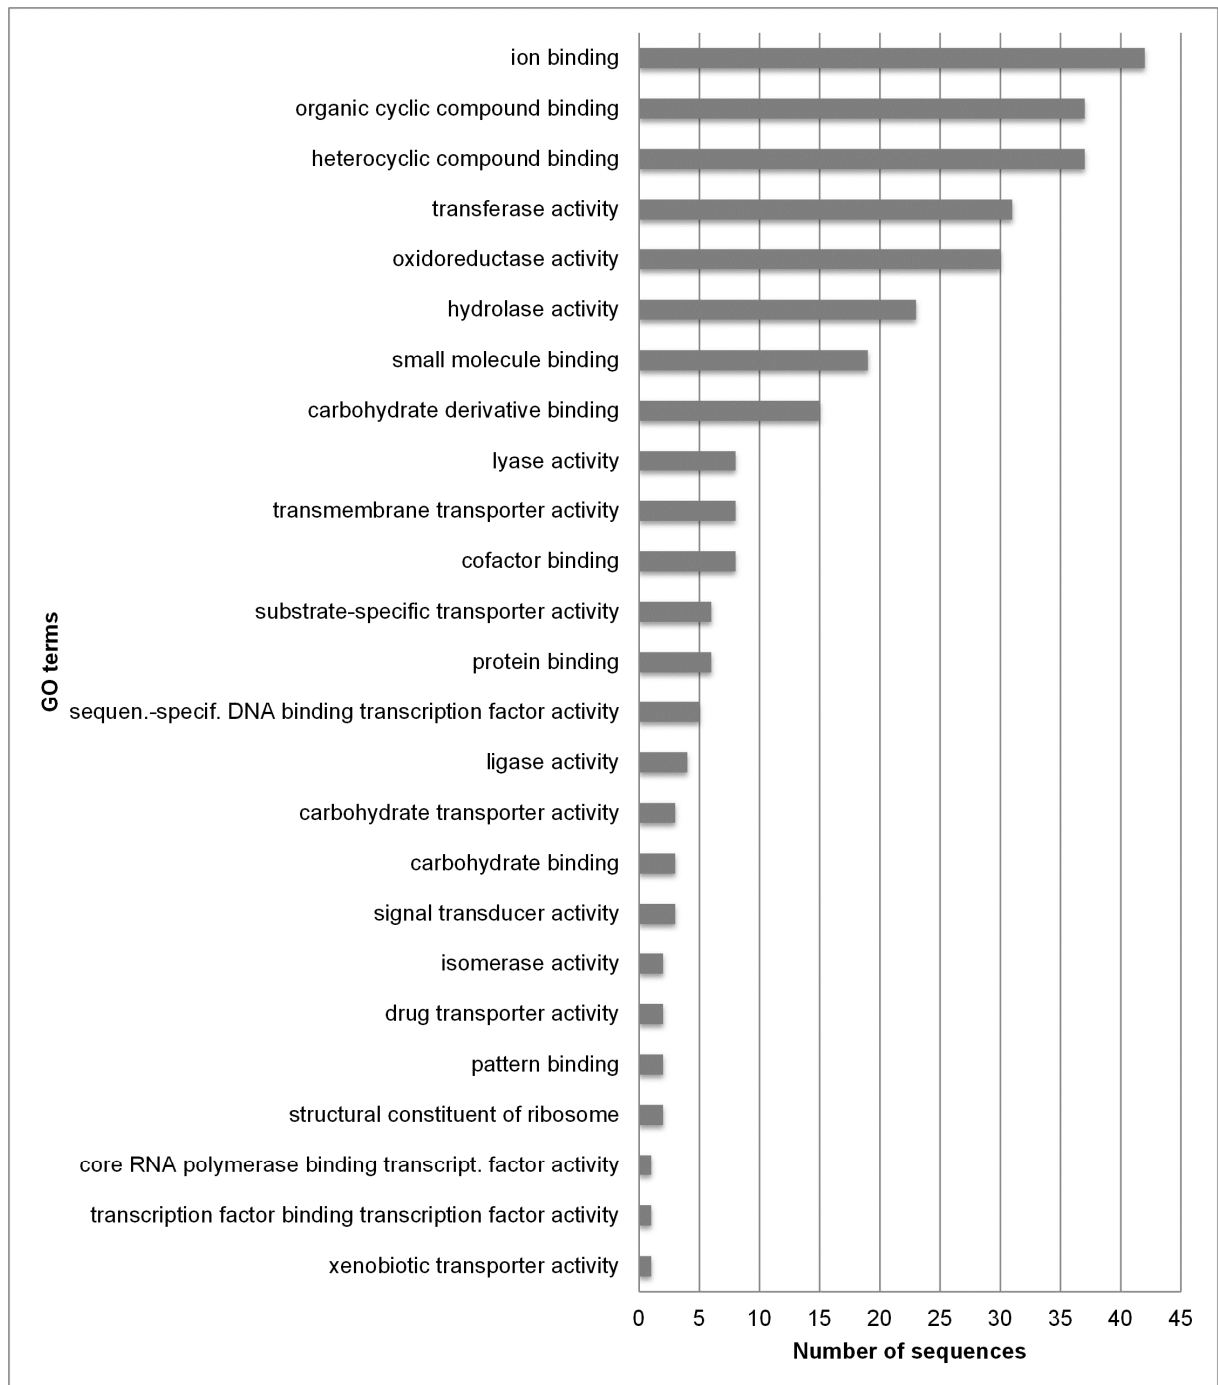

## Sampling day July 19

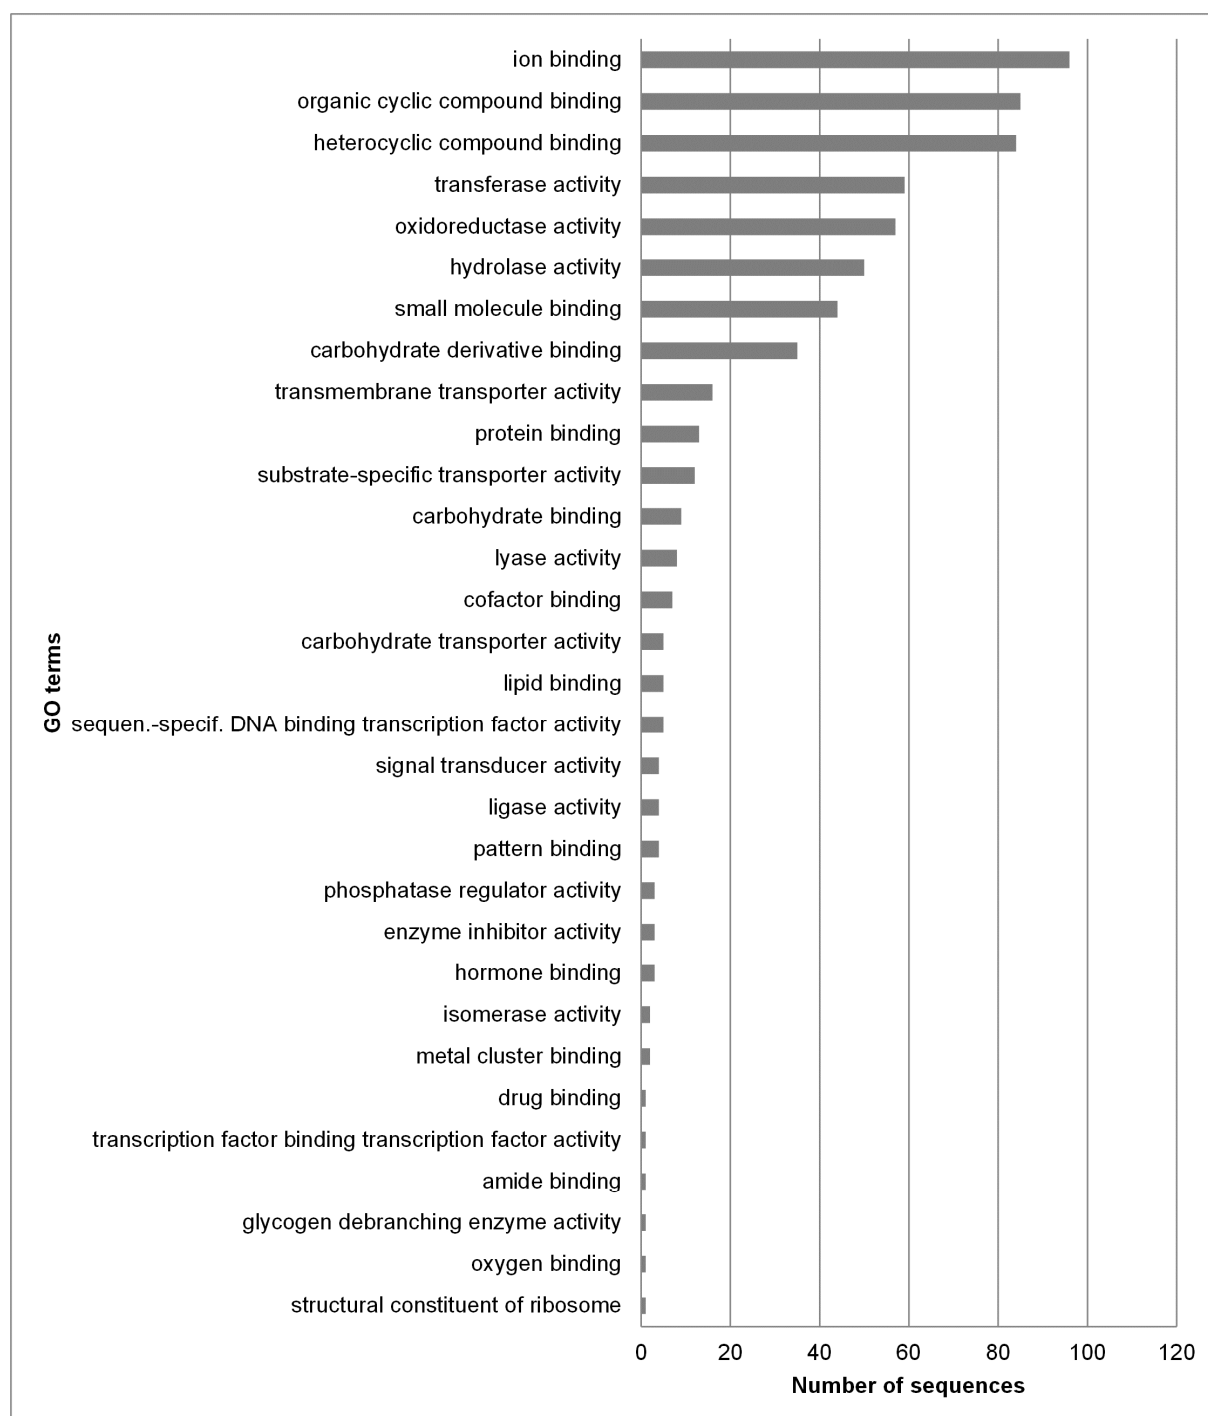

## Sampling day July 26

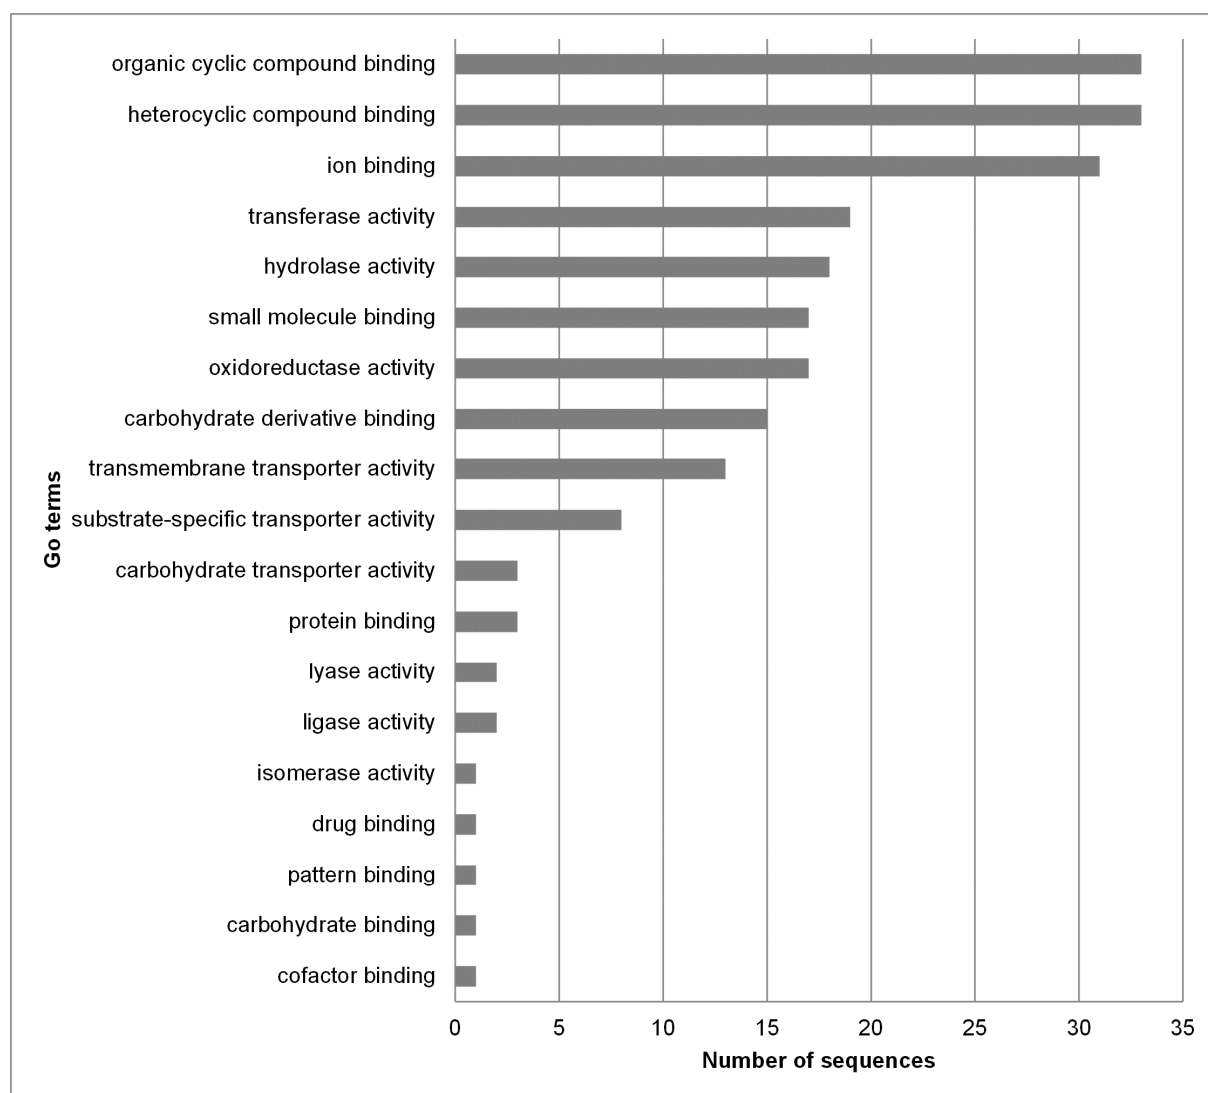

Supplement: pone.0184167.s006.pdf [file pone.0184167.s006.pdf]
